# Supplementary material for: High-temperature annealing enables the dielectric modulation of MXene for enhanced electromagnetic wave absorption and shielding
Source: Royal Society of Chemistry journal article supplement (doi:10.1039/d5nr03857j), 2025-01-01
Supplement: d5nr03857j1.pdf [file d5nr03857j1.pdf]

## Supporting information

### High-temperature annealing enables MXene dielectric modulation for enhancing electromagnetic wave absorption and shielding

**Qingtao Lv**<sup>a, b, c</sup>, **Lei Ding**<sup>e</sup>, **Yawen Liu**<sup>a, b</sup>, **Zhiyong Su**<sup>c</sup>, **Teng Zhang**<sup>b</sup>,  
**Yudan Wang**<sup>a</sup>, **Tao Wu**<sup>c, d, \*</sup>, **Xiaolong Wang**<sup>c, d, \*</sup>, **Chunhong Zhang**<sup>a, b, \*</sup>

<sup>a</sup> Key Laboratory of Superlight Materials and Surface Technology of Ministry of Education, College of Materials Science and Chemical Engineering, Harbin Engineering University, Harbin, 150001, P. R. China.

<sup>b</sup> Harbin Engineering University Yantai Research Institute, Yantai, 264006, P. R. China.

<sup>c</sup> Shandong Laboratory of Advanced Materials and Green Manufacturing at Yantai, Yantai, 264006, P. R. China.

<sup>d</sup> State Key Laboratory of Solid Lubrication, Lanzhou Institute of Chemical Physics, Chinese Academy of Sciences, Lanzhou, 730000, P. R. China.

<sup>e</sup> Xi'an Aerospace Chemical Propulsion Co., Ltd. Xi'an, 710025, P.R. China.

#### **\*Corresponding author:**

**Address:** Harbin Engineering University Yantai Research Institute, Yantai, 264006, China (C. Zhang). Shandong Laboratory of Advanced Materials and Green Manufacturing at Yantai, Yantai, 264006, China (T. Wu and X. Wang).

**E-mail:** [zhangchunhong97@163.com](mailto:zhangchunhong97@163.com) (C. Zhang), [wutao@licp.cas.cn](mailto:wutao@licp.cas.cn) (T. Wu), [wangxl@licp.cas.cn](mailto:wangxl@licp.cas.cn) (X. Wang).

## **Materials**

Lithium fluoride (LiF, 99%), Titanium aluminum carbide ( $\text{Ti}_3\text{AlC}_2$ , 400 mesh, 95 %), 25 wt% tetrabutylammonium hydroxide (TBAOH) aqueous dispersion, ethyl acetate (EA, AR), and anhydrous ethanol were purchased from Sigma-Aldrich. Hydrochloric acid (HCl, 37 %) was purchased from Yantai Far East Fine Chemical Co. Phenolic Cyanate (C05C0400) was purchased from Yangzhou Tianqi New Material Co. The photocrosslinking components were purchased from the Lanzhou Institute of Chemical Physics, Chinese Academy of Sciences; The deionized water was produced in the laboratory.

## **Simulation Method:**

EM simulation analysis was conducted using CST Microwave Studio 2021. First, modeling was performed based on the module's capabilities. Subsequently, the EM parameters measured by the vector network analyzer were imported into the software. The reflection loss (RL) of a 3D unit meta-structure was numerically calculated using periodic boundary conditions with the Frequency Domain Solver. Additionally, the boundary condition  $Z_{\min}$  was configured as an electric wall, while  $Z_{\max}$  was designated as open space. The remaining boundary conditions were established as the unit cell.

## **Characterization**

Scanning electron microscopy (SEM, CLARA GHM) was used to analyze the samples' layered structure, surface, and cross-sectional morphology. XRD spectra of the samples were acquired using a D8 ADVANCE XRD system with Cu  $K\alpha$  radiation ( $\lambda = 1.5406 \text{ \AA}$ ) over a scanning range of  $5^\circ$  to  $90^\circ$ ; the scanning rate was  $5^\circ \text{ min}^{-1}$ . Transmission

electron microscopy (TEM, FEI-TALOS-F200X) was used to characterize the micromorphology, crystallite spacing, and crystallite index of  $\text{TiO}_2$ . X-ray photoelectron spectroscopy (XPS, Thermo Kalpha) determined the samples' chemical state and chemical bonding. The samples were analyzed by Raman spectroscopy using a LabRam HR Evolution Raman spectroscopy system (532 nm laser emitter). The thermal stability of  $\text{Ti}_3\text{C}_2\text{T}_x$  was analyzed using a thermogravimetric analyzer (TG 209 F3 Tarsus) with a heating temperature of  $10\text{ }^\circ\text{C min}^{-1}$  over a temperature range of  $30\sim 800^\circ\text{C}$ . The samples' electrical conductivity was characterized at different pressures (10 MPa, 14 MPa, and 18 MPa) using a resistivity tester (ST2253y). The macroscopic morphology of 3D-printed bionic superstructure samples was characterized using a fully automated 3D super depth-of-field video microscope (DVM6A). The surface water contact angle of 3D samples was determined using a contact angle tester (SDC-100).

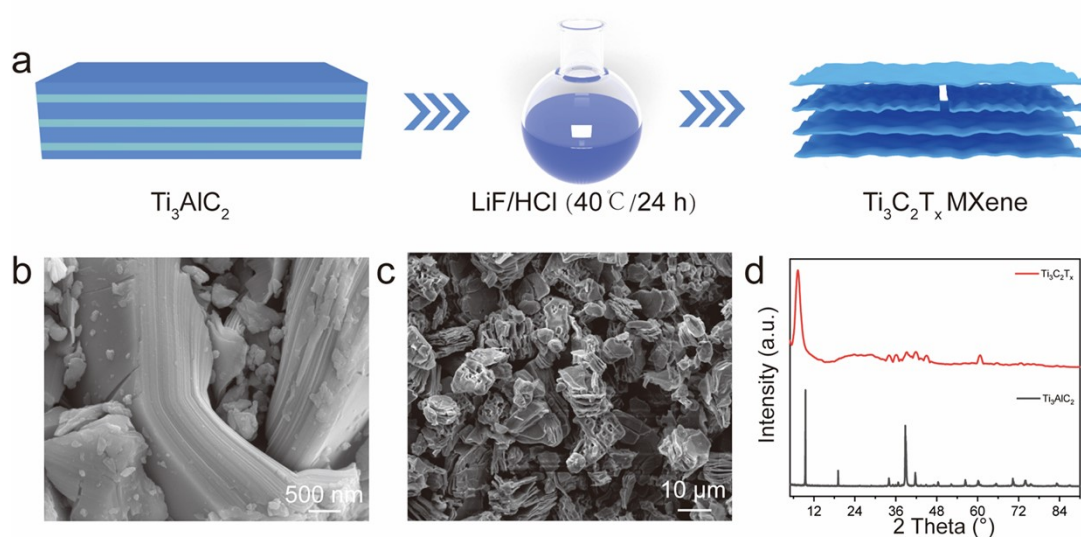

Fig. S1 Characterization of structural morphology and physical phase components of  $\text{Ti}_3\text{AlC}_2$  before and after etching. (a) Schematic of  $\text{Ti}_3\text{C}_2\text{T}_x$  MXene preparation. SEM

and TEM images of (b)  $\text{Ti}_3\text{AlC}_2$  and (c)  $\text{Ti}_3\text{C}_2\text{T}_x$  MXene. (d) XRD patterns of  $\text{Ti}_3\text{AlC}_2$  and  $\text{Ti}_3\text{C}_2\text{T}_x$  MXene.

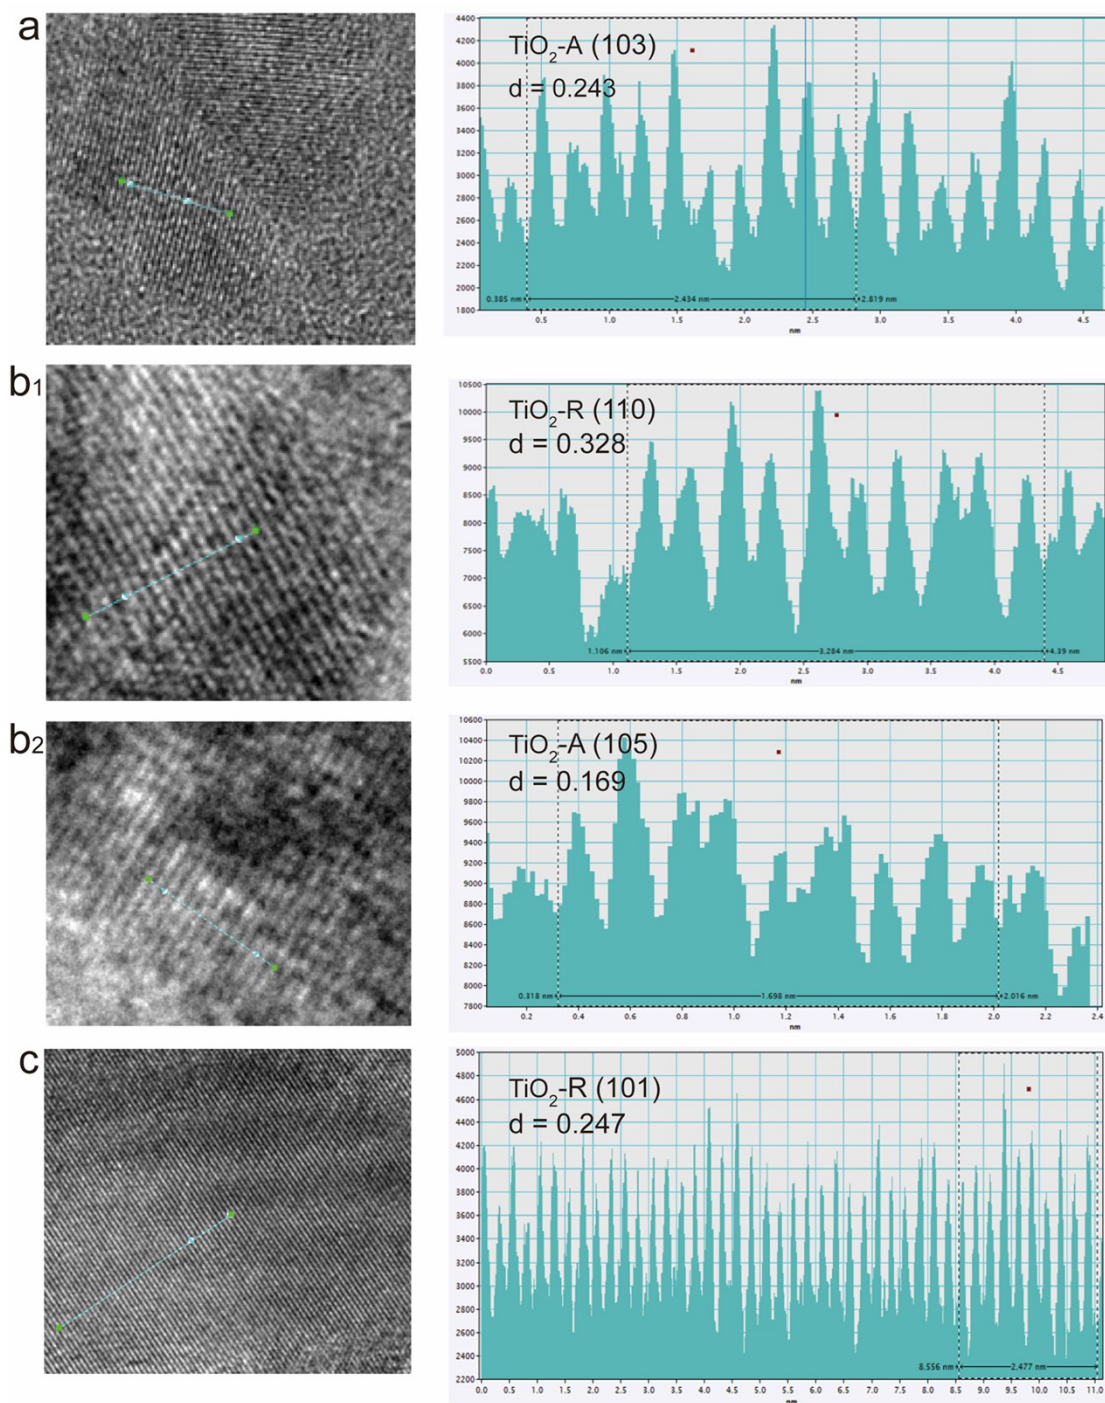

Fig. S2. a-c) HRTEM image of  $\text{TiO}_2\text{-A}$ ,  $\text{TiO}_2\text{-R}$ , and the corresponding inverse fast Fourier transform (IFFT) lattice fringes are used to interpret the crystallographic indices and spacings in Figure 2.

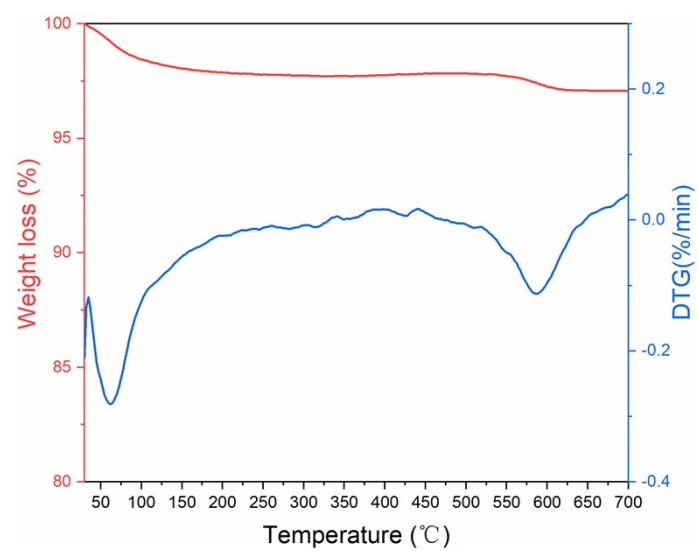

Fig. S3. TGA and DTG curves of  $\text{Ti}_3\text{C}_2\text{T}_x$  MXene in  $\text{N}_2$ .

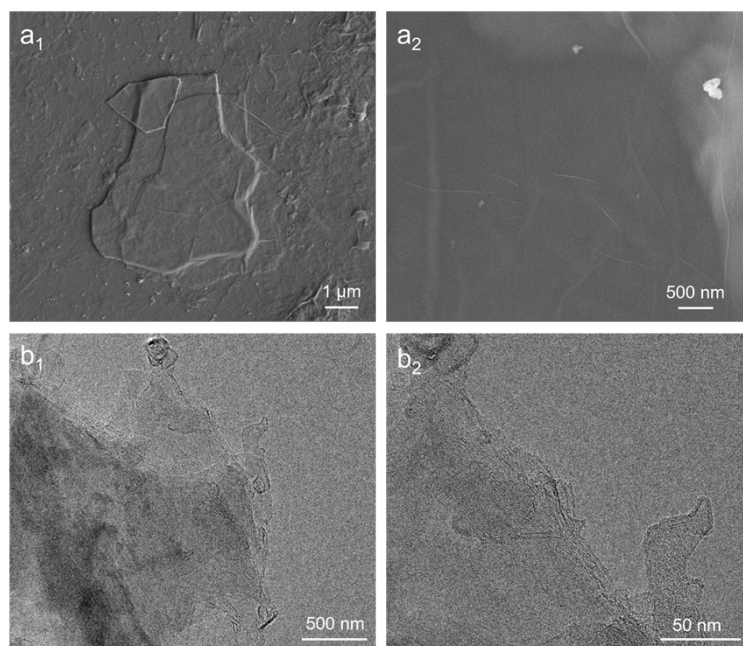

Fig. S4  $a_1$  and  $a_2$ ) SEM,  $b_1$  and  $b_2$ ) TEM surface images of  $\text{Ti}_3\text{C}_2\text{T}_x$  MXene.

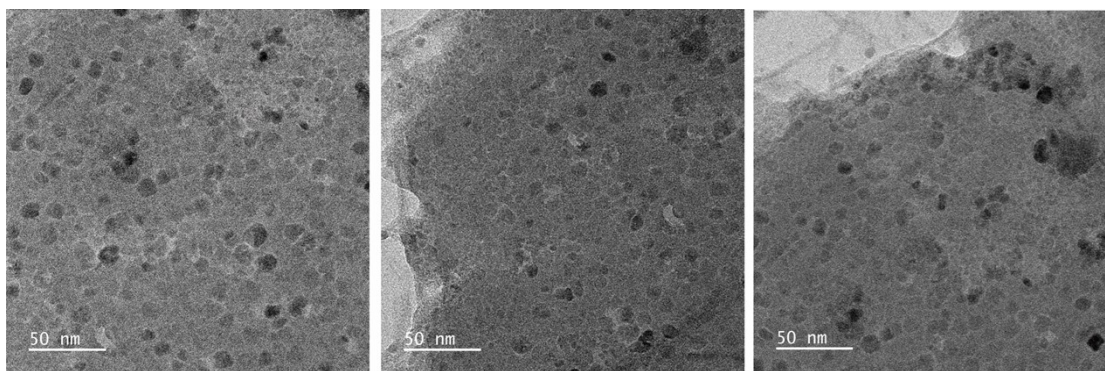

Fig. S5. TEM images of  $\text{TiO}_2\text{-A-NP}@ \text{Ti}_3\text{C}_2\text{T}_x$  MXene.



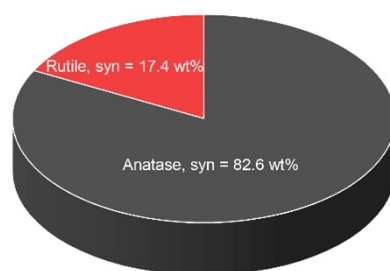

Quantitative Analysis from Profile-Fitted Peaks

Fig. S6. The mass fraction of TiO<sub>2</sub>-A and TiO<sub>2</sub>-R based on the XRD pattern of the TiO<sub>2</sub>-AR-HJ@Ti<sub>3</sub>C<sub>2</sub>T<sub>x</sub>.

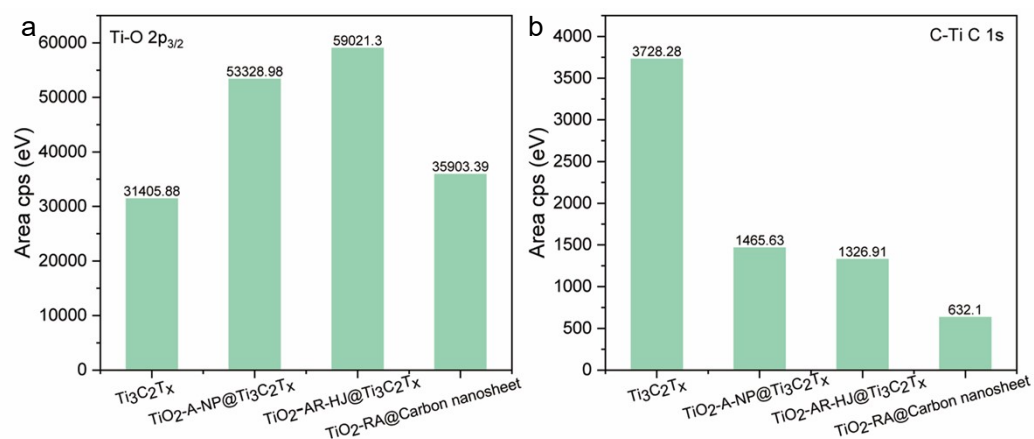

Fig. S7. The a) Ti-O 2p<sub>3/2</sub> and b) C-Ti Area cps of Ti<sub>3</sub>C<sub>2</sub>T<sub>x</sub>, TiO<sub>2</sub>-A-NP@Ti<sub>3</sub>C<sub>2</sub>T<sub>x</sub>, TiO<sub>2</sub>-AR-HJ@Ti<sub>3</sub>C<sub>2</sub>T<sub>x</sub>, and TiO<sub>2</sub>-RA@Carbon nanosheet.

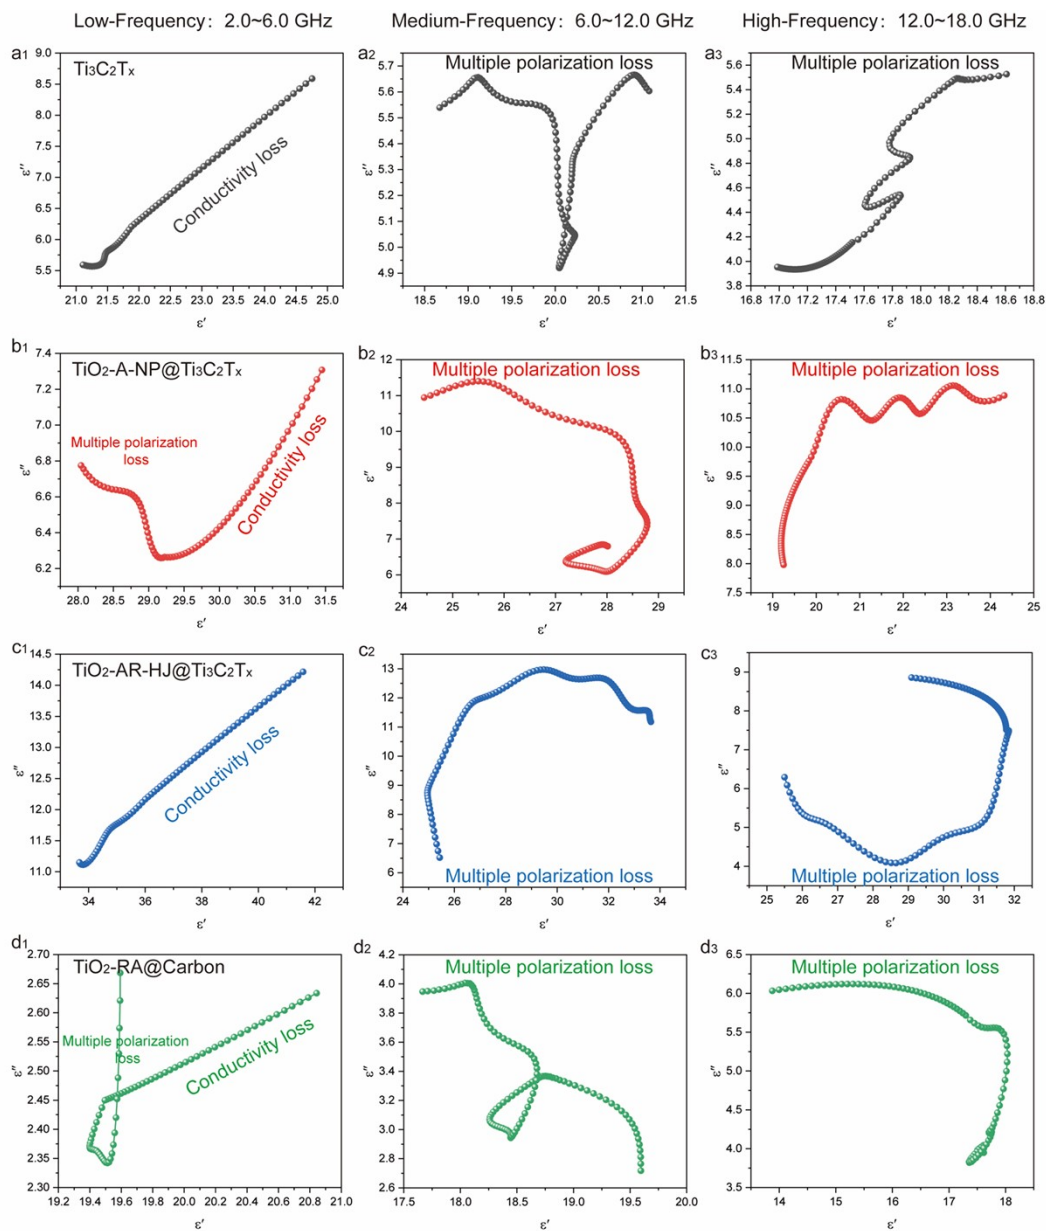

Fig. S8. Cole-Cole curves of (a<sub>1</sub>-a<sub>3</sub>)  $\text{Ti}_3\text{C}_2\text{T}_x$ , (b<sub>1</sub>-b<sub>3</sub>)  $\text{TiO}_2\text{-A-NP@Ti}_3\text{C}_2\text{T}_x$ , (c<sub>1</sub>-c<sub>3</sub>)

$\text{TiO}_2\text{-AR-HJ@Ti}_3\text{C}_2\text{T}_x$ , and (d<sub>1</sub>-d<sub>3</sub>)  $\text{TiO}_2\text{-RA@Carbon}$  nanosheet.

As shown in Fig. S7a<sub>1</sub>-c<sub>1</sub>, within the thickness range of 1.0~2.0 mm, TiO<sub>2</sub>-A-NP@Ti<sub>3</sub>C<sub>2</sub>T<sub>x</sub> has the minimum reflection loss value (-37.5 dB). In contrast, TiO<sub>2</sub>-AR-HJ@Ti<sub>3</sub>C<sub>2</sub>T<sub>x</sub> MXene has the maximum reflection loss value (-14.55 dB) due to the strong impedance mismatch on the surface. As shown in Fig. S7a<sub>2</sub>-c<sub>2</sub>, TiO<sub>2</sub>-A-NP@Ti<sub>3</sub>C<sub>2</sub>T<sub>x</sub> achieves the optimal effective absorption bandwidth (4.3 GHz) at a thickness of 1.12 mm, which is attributed to the excellent impedance matching characteristics imparted to MXene by nano-TiO<sub>2</sub>-A-NP.

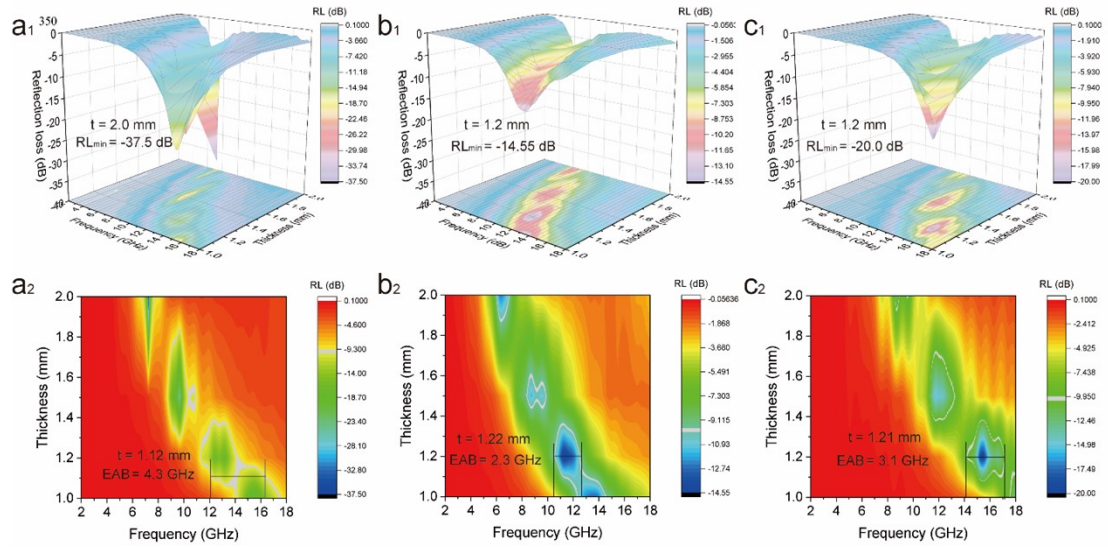

Fig. S9. a<sub>1</sub>-c<sub>1</sub>) 3D RL diagrams, (a<sub>2</sub>-c<sub>2</sub>) 2D projection images for TiO<sub>2</sub>-A-NP@Ti<sub>3</sub>C<sub>2</sub>T<sub>x</sub> MXene, TiO<sub>2</sub>-AR-HJ@Ti<sub>3</sub>C<sub>2</sub>T<sub>x</sub> MXene, and TiO<sub>2</sub>-RA@Carbon nanosheet.

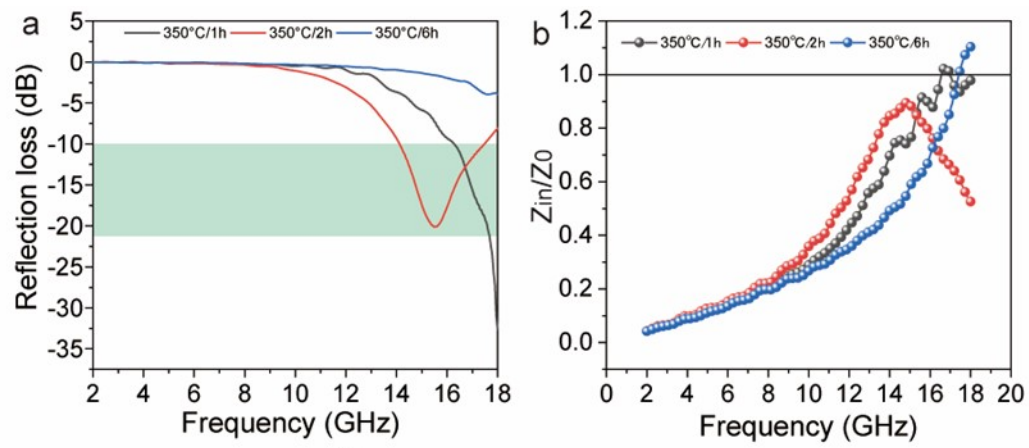

Fig. S10. The a) Reflection loss, b)  $Z_{\text{in}}/Z_0$  of  $\text{Ti}_3\text{C}_2\text{T}_x$  MXene after 350 °C/1h, 350 °C/2h, and 350 °C/6h.

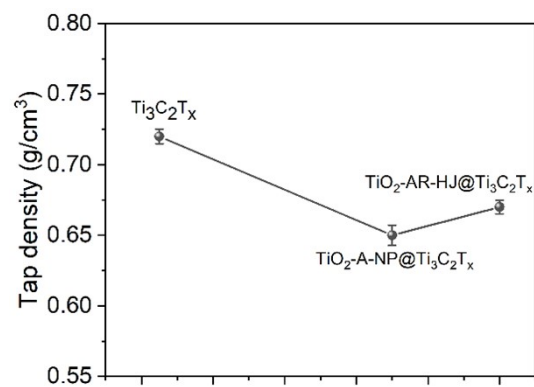

Fig. S11. The tap density of  $\text{Ti}_3\text{C}_2\text{T}_x$ ,  $\text{TiO}_2\text{-A-NP@Ti}_3\text{C}_2\text{T}_x$ , and  $\text{TiO}_2\text{-AR-HJ@Ti}_3\text{C}_2\text{T}_x$ .

Tab. S1 The EMW absorption properties of recent similar materials.

| Material Name                                                        | Matrix | Filler loading (wt%) | Thickness (mm) | EAB (GHz) | RLmin (dB) | Refs      |
|----------------------------------------------------------------------|--------|----------------------|----------------|-----------|------------|-----------|
| TiO <sub>2</sub> -A-NP@MXene                                         | Wax    | 50                   | 1.00           | 3.36      | -20.1      | This work |
| Nano-diamond@MXene (MN3)                                             | Wax    | 50                   | 1.00           | 0.00      | ≈-9.90     | [2]       |
| Cl/Ni@MXene (Cl/Ni-MX-6)                                             | Wax    | 40                   | 1.00           | 0.00      | -10.0      | [3]       |
| Co <sub>3</sub> O <sub>4</sub> -C@MXene                              | Wax    | 20                   | 1.00           | 0.00      | -2.50      | [4]       |
| NiCoO <sub>4</sub> @MXene(P-MXene/NiCo <sub>2</sub> O <sub>4</sub> ) | Wax    | 50                   | 1.00           | 0.00      | ≈-5.0      | [5]       |
| Mesoporous MXene                                                     | Wax    | 7.0                  | 1.92           | 2.32      | -49.54     | [6]       |
| SiO <sub>2</sub> @MXene                                              | Wax    | 45                   | 3.52           | 1.60      | -50.11     | [7]       |
| Ni-chain@MXene (Ni-10% MXene)                                        | Wax    | 10                   | 2.0            | 1.80      | -16.9      | [8]       |
| Network-like MXene nanoribbons (N-MXene NRs)                         | Wax    | 50                   | 1.0            | 0.80      | ≈-10.5     | [9]       |
| MXene/amorphous carbon/TiO <sub>2</sub>                              | Wax    | 50                   | 1.85           | 2.80      | -45.0      | [10]      |
| CNTs/MXene                                                           | Wax    | 35                   | 2.00           | 3.00      | -17.0      | [11]      |
| Porous MXene monolayer (P-MXene ML)                                  | Wax    | 50                   | 1.00           | 0.00      | ≈-7.00     | [9]       |
| Porous MXene layer (P-MXene ML)                                      | Wax    | 50                   | 1.00           | 0.00      | ≈-6.50     | [9]       |

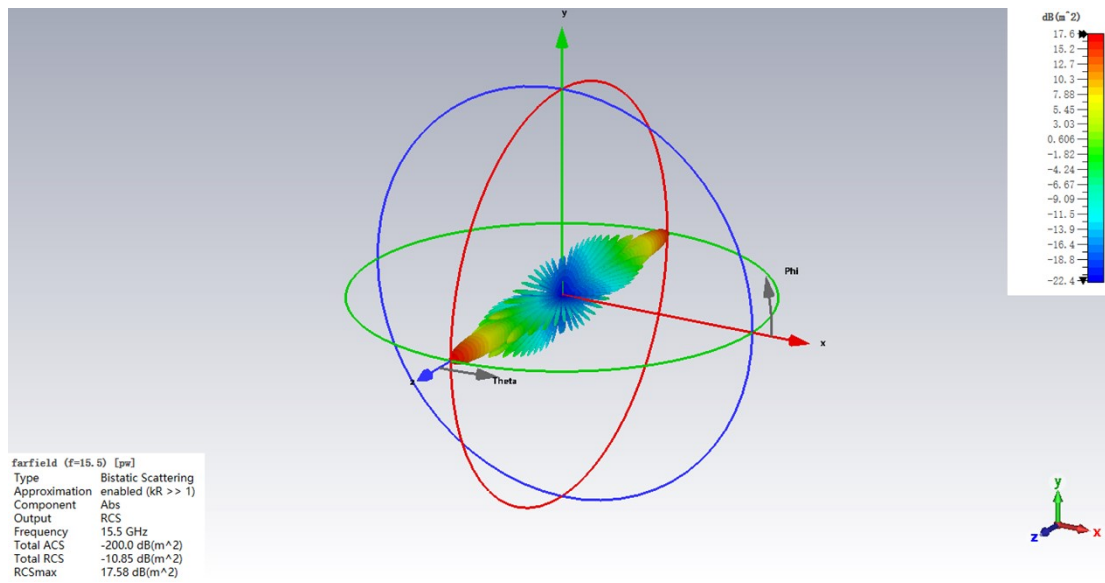

Fig. S12. The 3D RCS diagram of PEC.



## Reference

- [1] Q. Zhang, H. Lai, R. Fan, P. Ji, X. Fu, H. Li, *ACS Nano* 2021, 15, 5249-5262.
- [2] Q. Tang, H. Jiang, F. Wu, J. Shen, *Diam. Relat. Mater.* 2024, 149, 111663.
- [3] Y. He, Q. Su, D. Liu, L. Xia, X. Huang, D. Lan, Y. Liu, Y. Huang, B. Zhang, *Chem. Eng. J.* 2024, 491, 152041.
- [4] Y. Hou, Z. Jia, H. Zheng, Z. Hu, L. Shen, D. Liu, L. Li, S. Liu, Y. Liu, S. Yu, *Diam. Relat. Mater.* 2024, 150, 111692.
- [5] C. Zhao, X. Zeng, R. Yu, *Synthetic Metals* 2023, 297, 117402.
- [6] L. Zhu, W. Wu, J. Chen, Z. Hu, J. Yu, Y. Wang, *Chem. Eng. J.* 2024, 488, 150649.
- [7] R. Guo, Y. Fan, L. Wang, W. Jiang, *Carbon* 2020, 169, 214-224.
- [8] L. Liang, G. Han, Y. Li, B. Zhao, B. Zhou, Y. Feng, J. Ma, Y. Wang, R. Zhang, C. Liu, *ACS Appl. Mater. Interfaces* 2019, 11, 25399-25409.
- [9] X. Zeng, C. Zhao, X. Jiang, R. Yu, R. Che, *Small* 2023, 19, 2303393.
- [10] M. Han, X. Yin, H. Wu, Z. Hou, C. Song, X. Li, L. Zhang, L. Cheng, *ACS Appl. Mater. Interfaces* 2016, 8, 21011-21019.
- [11] X. Li, X. Yin, M. Han, C. Song, H. Xu, Z. Hou, L. Zhang, L. Cheng, *J. Mater. Chem. C.* 2017, 5, 4068-4074.
